# Supplementary material for: Molecularly imprinted peptide-based enzyme mimics with enhanced activity and specificity
Source: Royal Society of Chemistry journal article supplement (doi:10.1039/d0sm00635a), 2020-01-01
Supplement: d0sm00635a1.pdf [file d0sm00635a1.pdf]

## Supporting Information

### **Molecularly imprinted peptide-based enzyme mimics with enhanced activity and specificity**

Jingyi Li,<sup>†,‡</sup> Mingjie Zhu,<sup>‡</sup> Mengfan Wang,<sup>\*,a,b</sup> Wei Qi,<sup>a,b,d</sup> Rongxin Su,<sup>a,b,d</sup> and Zhimin He<sup>a</sup>

a. School of Chemical Engineering and Technology, State Key Laboratory of Chemical Engineering, Tianjin University, Tianjin 300350, P. R. China.

E-mail: [mwang@tju.edu.cn](mailto:mwang@tju.edu.cn)

b. Tianjin Key Laboratory of Membrane Science and Desalination Technology, Tianjin 300350, P. R. China.

c. School of Medicine, Nankai University, Tianjin 300071, P. R. China

d. The Co-Innovation Centre of Chemistry and Chemical Engineering of Tianjin, Tianjin 300350, P. R. China.

<sup>†</sup> Electronic Supplementary Information (ESI) available: 1. See DOI: 10.1039/x0xx00000x

<sup>‡</sup> These authors contributed equally to this work.

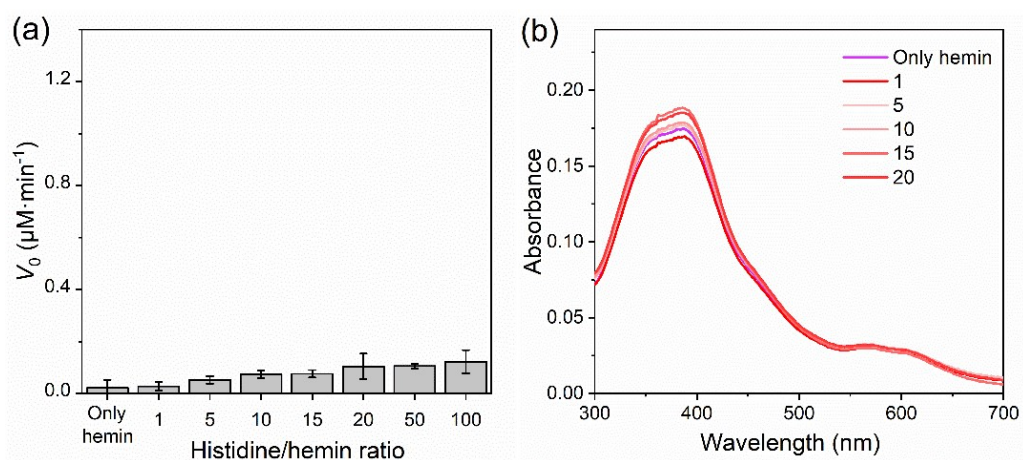

**Fig. S1** The catalytic activities (a) and UV-vis spectrums (b) of histidine/hemin co-assemblies at different ratios.

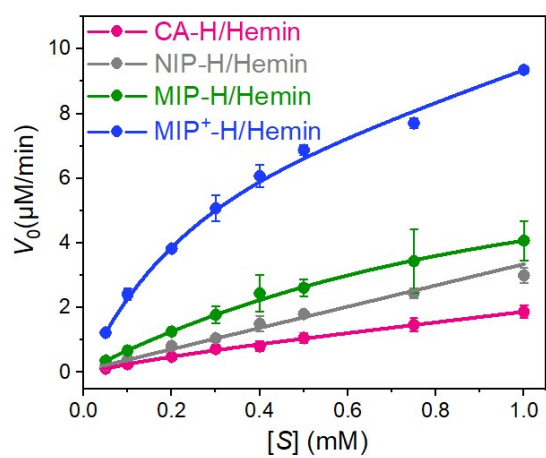

**Fig. S2** The plots of the initial reaction rate ( $V_0$ ) versus ABTS concentration  $[S]$  in the reactions catalyzed by CA-H/Hemin, NIP-H/Hemin, MIP-H/Hemin, and MIP<sup>+</sup>-H/Hemin.

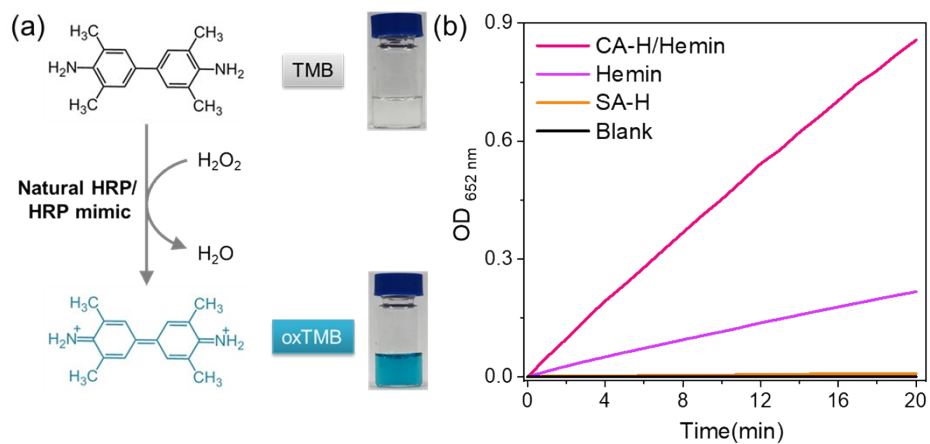

**Fig. S3** The enzymatic reaction of TMB with the presence of  $H_2O_2$  (a). Plots of  $OD_{652\text{ nm}}$  vs time for the oxidation reaction of TMB (b).

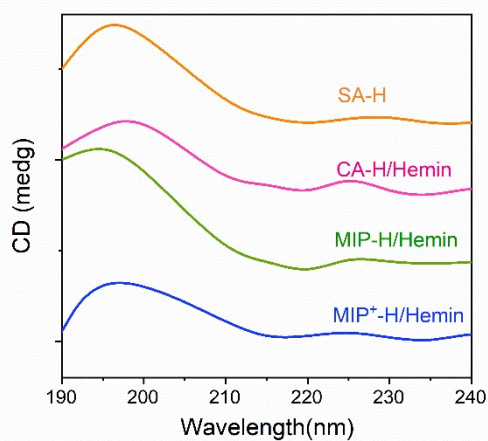

**Fig.S4** The CD spectrums of SA-H, CA-H/Hemin, MIP-H/Hemin and MIP<sup>+</sup>-H/Hemin under 75 °C.

**Table S1.** Comparison of kinetic parameters of some POD-like catalysts

| Catalyst                                 | Substrate | $K_m$ (mM) | $V_{max}$ (mM $\cdot$ S <sup>-1</sup> ) | $k_{cat}/K_m$ (mM <sup>-1</sup> $\cdot$ S <sup>-1</sup> ) | Reference |
|------------------------------------------|-----------|------------|-----------------------------------------|-----------------------------------------------------------|-----------|
| Fe <sup>II</sup> Fe <sup>III</sup> LDHNS | ABTS      | 0.68       | $7.194 \times 10^{-5}$                  | -                                                         | 1         |
| PrussianBlue NPS                         | ABTS      | 157.45     | $8.475 \times 10^{-6}$                  | $2.69 \times 10^{-6}$                                     | 2         |
| WO <sub>x</sub> QDs                      | ABTS      | 0.79       | -                                       | -                                                         | 3         |
| Pu39WT-hemin                             | ABTS      | 65.93      | $1.463 \times 10^{-4}$                  | $4.438 \times 10^{-3}$                                    | 4         |
| Co <sup>2+</sup> -Trp                    | ABTS      | 12.1       | $4.7 \times 10^{-4}$                    | $3.884 \times 10^{-4}$                                    | 5         |
| Ni/Co LDHs                               | ABTS      | 3.43       | $3.29 \times 10^{-5}$                   | -                                                         | 6         |
| MgFe <sub>2</sub> O <sub>4</sub>         | ABTS      | 0.14       | $12.54 \times 10^{-5}$                  | -                                                         | 7         |
| NiFe <sub>2</sub> O <sub>4</sub>         | ABTS      | 0.46       | $17.48 \times 10^{-5}$                  | -                                                         | 7         |
| Au-Ni/g-C <sub>3</sub> N <sub>4</sub>    | ABTS      | 0.51       | $4.79 \times 10^{-5}$                   | -                                                         | 8         |
| Au/g-C <sub>3</sub> N <sub>4</sub>       | ABTS      | 0.73       | $3.43 \times 10^{-5}$                   | -                                                         | 8         |
| Ni/g-C <sub>3</sub> N <sub>4</sub>       | ABTS      | 0.96       | $2.4 \times 10^{-5}$                    | -                                                         | 8         |
| CA-H/Hemin                               | ABTS      | 2.63       | $1.127 \times 10^{-4}$                  | $2.142 \times 10^{-3}$                                    | this work |
| NIP-H/Hemin                              | ABTS      | 2.32       | $1.335 \times 10^{-4}$                  | $2.874 \times 10^{-3}$                                    | this work |
| MIP-H/Hemin                              | ABTS      | 1.19       | $1.497 \times 10^{-4}$                  | $6.289 \times 10^{-3}$                                    | this work |
| MIP <sup>+</sup> -H/Hemin                | ABTS      | 0.56       | $2.433 \times 10^{-4}$                  | $2.176 \times 10^{-2}$                                    | this work |

**Table S2.** The Fe content in MIP<sup>+</sup>-H/Hemin after 6 cycles

|                | Sample (mg $\cdot$ L <sup>-1</sup> ) | Fe (mg $\cdot$ L <sup>-1</sup> ) | Fe content (%) |
|----------------|--------------------------------------|----------------------------------|----------------|
| Initial        | 8.5                                  | 0.039                            | 0.45           |
| After 6 cycles | 10                                   | 0.034                            | 0.34           |

## References

- 1 K. Ponlakheth, P. Jarujamrus, M. Amatatongchai and S. Tamuang, *Analytical Methods*, 2019, 11, 4785-4794
- 2 W. Zhang, D. Ma and J. Du, *Talanta*, 2014, 120, 362-367
- 3 H. Peng, D. Lin, P. Liu, Y. Wu, S. Li, Y. Lei, W. Chen, Y. Chen, X. Lin, X. Xia and A. Liu, *Analytica chimica acta*, 2017, 992, 128-134
- 4 B. Liu, D. Li and H. Shang, *Chem Cent J*, 2014, 8,
- 5 Y. Guo, L. Xu and A. Liu, *Chem-Asian J*, 2020,
- 6 L. Su, X. Yu, W. Qin, W. Dong, C. Wu, Y. Zhang, G. Mao and S. Feng, *J Mater Chem B*, 2017, 5, 116-122
- 7 L. Su, W. Qin, H. Zhang, Z. U. Rahman, C. Ren, S. Ma and X. Chen, *Biosens Bioelectron*, 2015, 63, 384-391
- 8 G. Darabdhara, J. Bordoloi, P. Manna and M. R. Das, *Sensors and Actuators B: Chemical*, 2019, 285, 277-290
